# Supplementary material
Source: PubMed Central journal article supplement (PMC2879440)
Supplement: NIHMS187644-supplement-01.pdf [file NIHMS187644-supplement-01.pdf]

Supplementary Table 1.

Mount Frequency (#/minute)

|         | Pretest 1 | Pretest 2 | Posttest 1 | Posttest 2 |
|---------|-----------|-----------|------------|------------|
| Young-T | 3.85±0.54 | 3.43±0.45 | 4.84±0.54  | 5.11±1.18  |
| Young-V | 3.15±0.20 | 3.29±0.38 | 2.63±0.41  | 1.47±0.45  |
| MA-T    | 2.34±0.32 | 2.42±0.52 | 2.64±0.45  | 2.93±0.37  |
| MA-V    | 2.05±0.43 | 2.82±0.43 | 0.82±0.27  | 1.14±0.43  |

Intromission Frequency (#/minute)

|         | Pretest 1 | Pretest 2 | Posttest 1 | Posttest 2 |
|---------|-----------|-----------|------------|------------|
| Young-T | 2.74±0.50 | 2.63±0.45 | 3.88±0.53  | 2.95±0.39  |
| Young-V | 2.56±0.16 | 2.55±0.32 | 1.53±0.40  | 0.62±0.32  |
| MA-T    | 1.23±0.14 | 1.49±0.35 | 1.79±0.31  | 1.86±0.27  |
| MA-V    | 1.43±0.31 | 1.54±0.27 | 0.36±0.19  | 0.60±0.31  |

Mount Latency (seconds)

|         | Pretest 1   | Pretest 2    | Posttest 1    | Posttest 2    |
|---------|-------------|--------------|---------------|---------------|
| Young-T | 47.18±17.30 | 40.69±10.87  | 18.50±5.95    | 54.50±19.11   |
| Young-V | 26.67±5.33  | 23.48±8.83   | 27.68±8.38    | 36.13±7.89    |
| MA-T    | 86.29±30.85 | 147.67±82.60 | 35.81±12.23   | 46.92±12.46   |
| MA-V    | 77.51±25.16 | 87.96±42.20  | 251.50±105.27 | 274.05±139.62 |

Data from Figure 3 are presented here as mean ± SEM.
